# Supplementary material for: A pH-responsive drug delivery system based on chitosan coated mesoporous silica nanoparticles
Source: Royal Society of Chemistry journal article supplement (doi:10.1039/c2jm30501a), 2012-01-01
Supplement: c2jm30501a.pdf [file c2jm30501a.pdf]

## Supporting Information

### pH-responsive drug delivery system based on chitosan coated mesoporous silica nanoparticles

Amirali Popat,<sup>a</sup> Jian Liu,<sup>a</sup> Gao Qing (Max) Lu,<sup>a</sup> Shi Zhang Qiao<sup>\*a,b</sup>

<sup>a</sup>Australian Institute for Bioengineering and Nanotechnology, The University of Queensland, St. Lucia, QLD 4072 Australia; Email: [s.qiao@uq.edu.au](mailto:s.qiao@uq.edu.au)

<sup>b</sup>School of Chemical Engineering, The University of Adelaide, SA5005, Australia

10

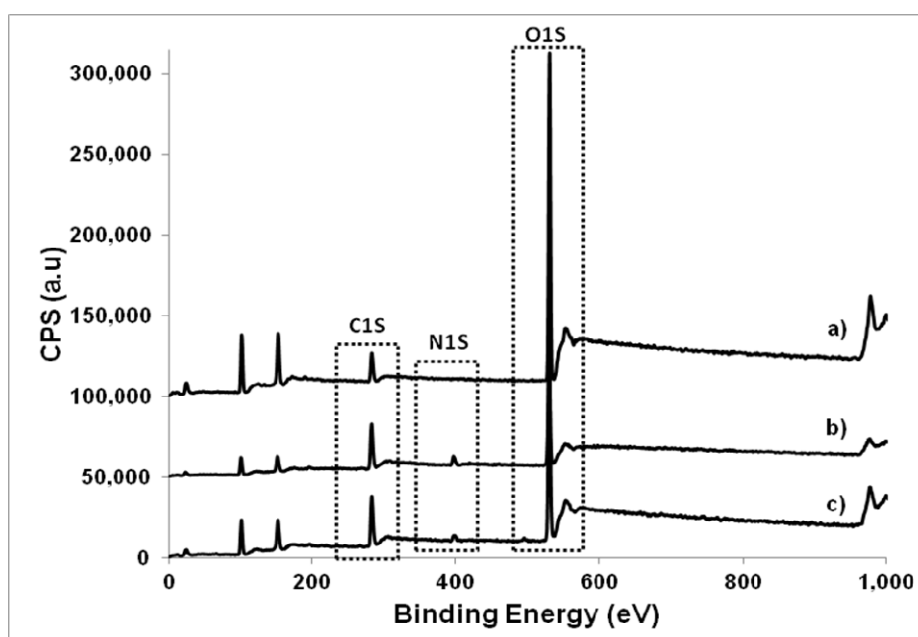

**Fig.S1** XPS survey spectra of a) MCM-41-PO<sub>3</sub><sup>-</sup>, b) MCM-41-P-Cs, c) MCM-41-P-Cs-Glu

15

20

25

30

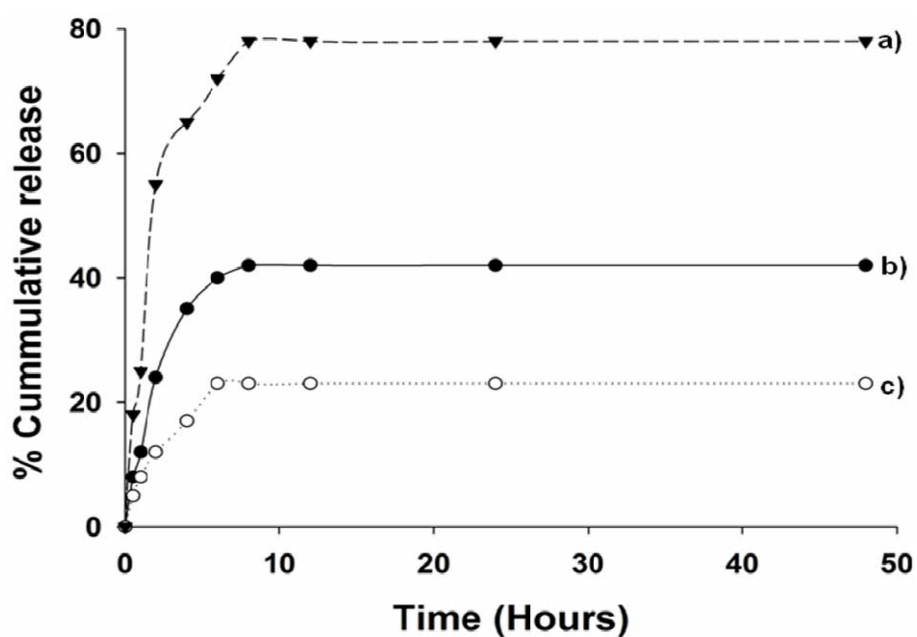

Fig S2. Cumulative release of Ibuprofen from various MSNs coated by different molecular weight chitosan: a) LMwtCs, b) MMwtCs, c) HMwtCs

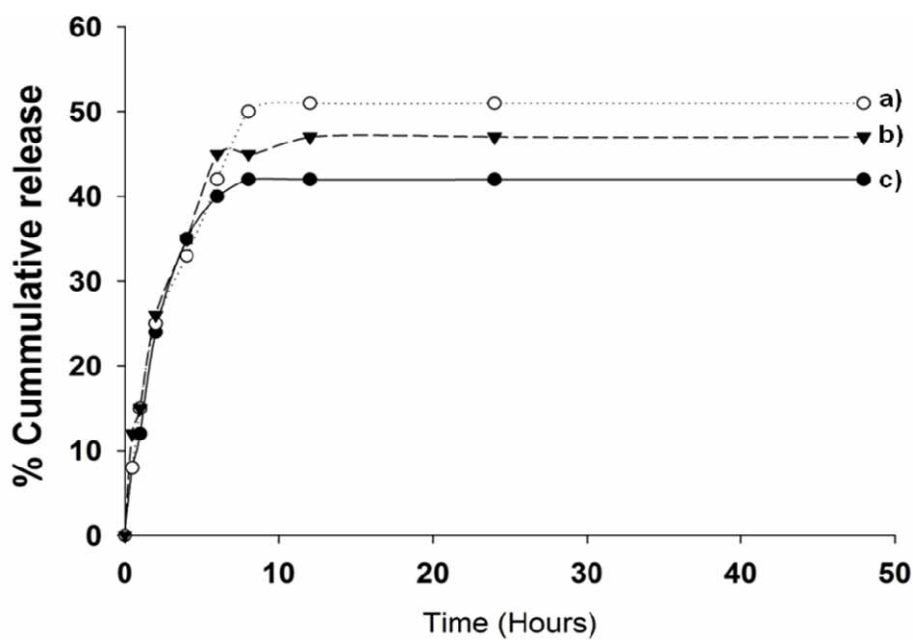

Fig S3. Cumulative release of Ibuprofen from various MSNs coated by different concentration of MMwtCs: a) 1%w/v, b) 2% w/v, c) 5% w/v
